# Supplementary material for: The impact of supervisor developmental feedback on clinical nurse specialist' meaningful work based on the Job Demands-Resources (JD-R) model: a parallel mediation model of work engagement and stress adaptation
Source: Research Square preprint supplement (doi:10.21203/rs.3.rs-6200515/v1), 2025-04-23
Supplement: Supplementary file 1 [file 94b81cffac2fc982253cf12d.docx]

**Supervisor Developmental Feedback Scale[1]**

|  | Strongly disagree | Disagree | Neutral | Agree | Strongly agree |
| --- | --- | --- | --- | --- | --- |
| 1. While giving me feedback, my supervisor focuses on helping me to learn and improve |  |  |  |  |  |
| 1. My supervisor provides me with useful information on how to improve my job performance |  |  |  |  |  |
| 1. My immediate supervisor gives me developmental feedback |  |  |  |  |  |

**Workplace Spirituality Scale[2]**

|  | Strongly disagree | Disagree | Neutral | Agree | Strongly agree |
| --- | --- | --- | --- | --- | --- |
| 1. The work I do in this job is fulfilling. |  |  |  |  |  |
| 1. The work I do in this job is rewarding. |  |  |  |  |  |
| 1. I do not achieve important outcomes from the work I do in this job. |  |  |  |  |  |
| 1. I am able to achieve important outcomes from the work I do in this job. |  |  |  |  |  |

**Utrecht Work Engagement Scale, UWES-9[3]**

|  | Never | Rarely | Sometimes | Often | Always |
| --- | --- | --- | --- | --- | --- |
| 1. At my work, I feel bursting with energy. |  |  |  |  |  |
| 1. When I get up in the morning, I feel like going to work. |  |  |  |  |  |
| 1. At my job, I feel strong and vigorous. |  |  |  |  |  |
| 1. I am enthusiastic about my job. |  |  |  |  |  |
| 1. My job inspires me. |  |  |  |  |  |
| 1. I am proud of the work that I do. |  |  |  |  |  |
| 1. I feel happy when I am working intensely. |  |  |  |  |  |
| 1. I am immersed in my work. |  |  |  |  |  |
| 1. When I am working, I forget everything else around me. |  |  |  |  |  |

**Stress Adaptation Scale, SAS[4, 5]**

|  | Strongly disagree | Disagree | Neutral | Agree | Strongly agree |
| --- | --- | --- | --- | --- | --- |
| 1. I tend to bounce back quickly after hard times. |  |  |  |  |  |
| 2.I usually come through difficult times with little trouble. |  |  |  |  |  |
| 3.I often change in positive ways after bad things happen. |  |  |  |  |  |
| 4. I tend to take a long time to get over setbacks in my life |  |  |  |  |  |
| 5.I usually discover ways to benefit from stressful events. |  |  |  |  |  |
| 6. It is hard for me to snap back when something bad happens. |  |  |  |  |  |
| 7.I tend to learn lessons from the difficult times that I have. |  |  |  |  |  |
| 8.It does not take me long to recover from a stressful event. |  |  |  |  |  |
| 9.I have a hard time making it through stressful events. |  |  |  |  |  |
| 10.I often find that I grow personally as a result of hard times. |  |  |  |  |  |

Note: Items 4,6,9 are reverse coded.

**Reference**

[1] ZHOU J. When the presence of creative coworkers is related to creativity: Role of supervisor close monitoring, developmental feedback, and creative personality [J]. Journal of Applied Psychology, 2003, 88(3): 413-22.

[2] ARNOLD K A, TURNER N, BARLING J, et al. Transformational leadership and psychological well-being: The mediating role of meaningful work [J]. Journal of Occupational Health Psychology, 2007, 12(3): 193-203.

[3] SCHAUFELI W B, BAKKER A B, SALANOVA M. The measurement of work engagement with a short questionnaire - A cross-national study [J]. Educational and Psychological Measurement, 2006, 66(4): 701-16.

[4] SMITH B W, DALEN J, WIGGINS K, et al. The brief resilience scale: Assessing the ability to bounce back [J]. International Journal of Behavioral Medicine, 2008, 15(3): 194-200.

[5] SMITH B, ALBONICO, K., GUZMAN, A., ET AL. The brief thriving scale: Assesing the ability to learn, grow, and find benefits in stressful events [J]. InternationalJournal of Wellbeing, 2023, 13(3): 134-50.
